# Supplementary material for: 4-phenylbutyric acid mediates therapeutic effect in systemic lupus erythematosus: Observations in an experimental murine lupus model
Source: PubMed Central journal article supplement — Exp Ther Med. 2021 Mar 3;21(5):460. doi: 10.3892/etm.2021.9891 (PMC7967889; doi:10.3892/etm.2021.9891), 2021-03-03

Figure S1. Murine splenocytes were stained with antibodies against CD3, CD45, CD69, CD4, CD25 and FoxP3, and then analyzed by flow cytometry. The gating was performed for activated T cells (CD3<sup>+</sup>CD69<sup>+</sup>), activated B cells (CD45<sup>+</sup>CD69<sup>+</sup>) and regulatory T cells (CD4<sup>+</sup>CD25<sup>+</sup>FoxP3<sup>+</sup>). 4-PBA, 4-phenylbutyric acid; DEXA, dexamethasone; VEH, vehicle.

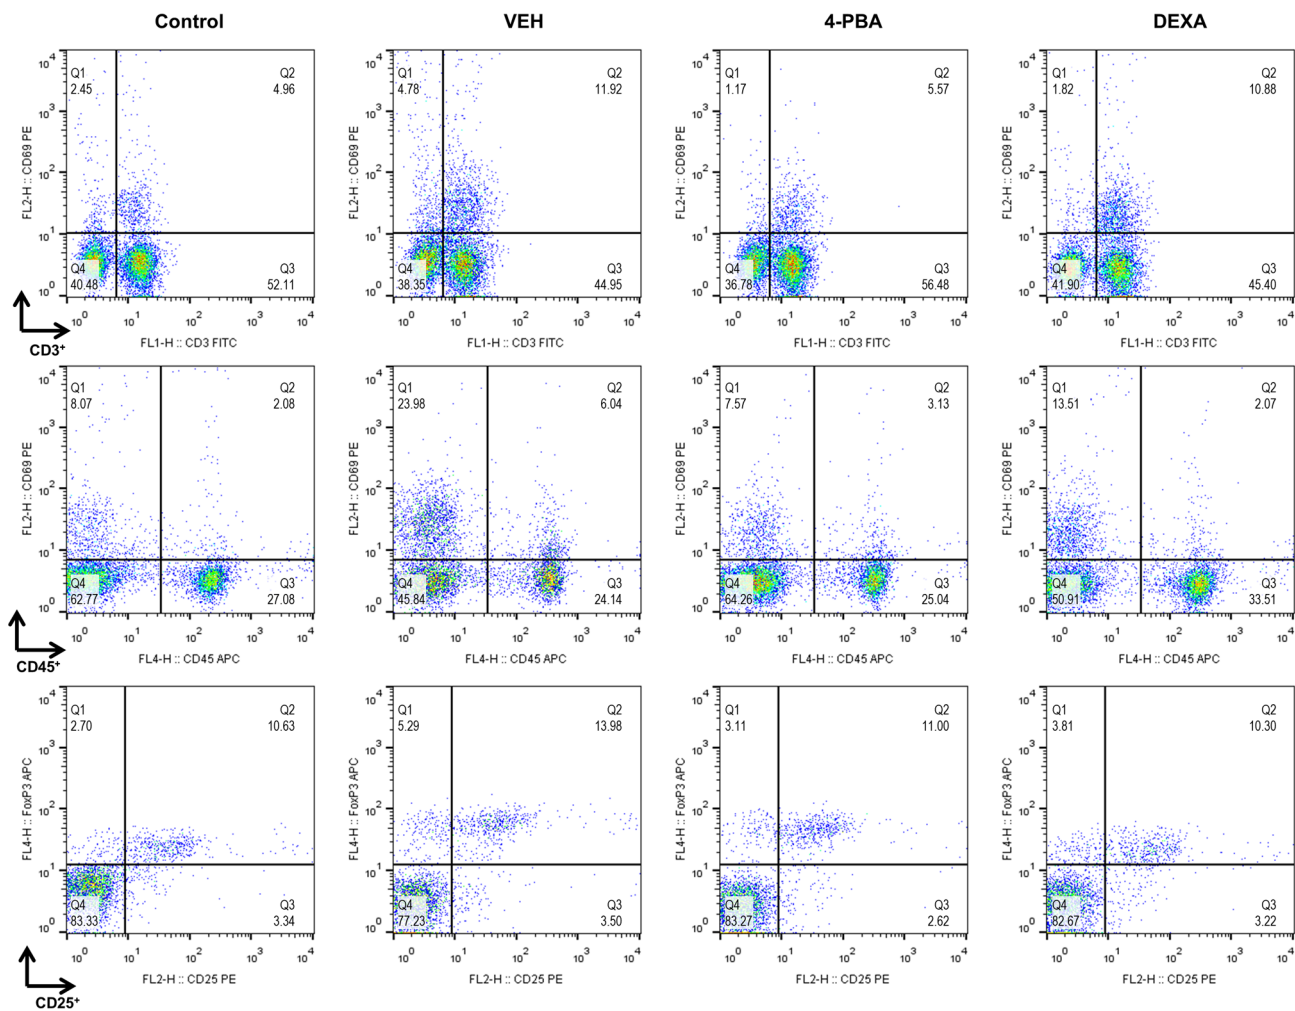

Supplement: Supplementary_Data.pdf [file Supplementary_Data.pdf]
